# Supplementary material for: Molecularly imprinted polymer sensor arraysElectronic supplementary information (ESI) available: experimental details. See http://www.rsc.org/suppdata/cc/b4/b401677g/
Source: Royal Society of Chemistry journal article supplement (doi:10.1039/b401677g), 2004-01-01
Supplement: b401677g.doc [file b401677g.doc]

# Supplementary Data

**Molecularly Imprinted Polymer Sensor Arrays**

Nathaniel T. Greene, Stephen L. Morgan, Ken D. Shimizu*

*Department of Chemistry and Biochemistry,*

*University of South Carolina, Columbia, SC 29209*

*Fax: 8037779521; Tel: 8037777809;* *E-mail:* [*shimizu@mail.chem.sc.edu*](mailto:shimizu@mail.chem.sc.edu)

**Polymer Preparation:**

Polymer preparation of the eight channeled sensor array (**P0** - **P7**) is as follows. In individual 7 mL glass vials was placed 22 g (0.64 mmol) AIBN, 1.04 mL (6.3 mmol) MAA, 9.52 mL (25.2 mmol) EDMA, 8 mL of poragen (toluene) and 1.28 mmol of template. The first polymer (**P0**) was made in the absence of any template to create a blank, non-imprinted polymer the remaining seven polymers (**P1** - **P7**) were made in the presence of analytes **A1** thru **A7**, respectively.

The individual vials were sonicated and degassed under nitrogen until all solids were completely dissolved and then sealed. Polymerizations were carried out using a Hanovia medium-pressure 450 watt mercury arc lamp encased in a glass water cooled immersion well. The vials were positioned 8 inches from the lamp in a refrigerated chamber which was initially set at 10 °C and warmed up to 30 °C over the course of the reaction. The polymerization vials are turned 180° after 20 minutes and once again at 60 and 180 minutes, then finally removed after 12 hours.

After polymerization, each polymer was removed and ground to fine powder in a mortar and pestle. The polymers were then placed in individual filter sacks. Three soxhlet extractions were preformed. The first wash consisted of a 28:72 azeotrope of acetic acid/acetonitrile while the second constituted a 4:1 ratio of acetonitrile/methanol. Due to residual acetic acid detected within the polymer it was necessary to repeat the second wash step with the addition of 10 grams of NaCO3. Polymers were then placed in a vacuum desiccator overnight (12 h) and allowed to dry. Upon removal, each polymer was shaken lightly in its’ filter pouch to help eliminate the polymer fines. A sieve was not used to achieve a particular size since pipette filters would later be used in the extraction process.

**Analyte (Template) Acquisition:**

Initially (+/-)-propranolol (**A1**), (1S, 2S)-(+)-pseudoephedrine (**A2**), and (1R, 2S)-(-)-ephedrine (**A3**) were free-based to obtain their pure form. This was accomplished by dissolving the analyte in a saturated solution of NaHCO3 (distilled H2O) then extracting the analyte in free form with CH2Cl2. With the addition of MgSO4 to dry the organic layer the solution was vacuum filtrated, then concentrated in vacuo. The remaining analytes (**A4** – **A7**) were able to be purchased in pure form for testing and polymer templation.

| Polymers | Analyte/Template | Polymers | Analyte/Template |
| --- | --- | --- | --- |
| **P0** | None | **P4** | **A4** |
| **P1** | **A1** | **P5** | **A5** |
| **P2** | **A2** | **P6** | **A6** |
| **P3** | **A3** | **P7** | **A7** |

**Table 1.** Shown is the eight channeled sensor array and the corresponding templates of each.

**Analyte Solutions:**

Each of the analytes listed above in Figure 1 were taken in their pure form (salts were free-based) and dissolved in 250 mL in acetonitrile to generate 3 mM solutions. Each of the solutions were capped and sonicated to promote analyte solvation.

**Experimental:**

Into 8 new 6 mL vials, 25 mg (± 2 mg) of each polymer P0-P7 is placed inside to create the array. The addition of 5 mL of a single analyte solution is combined with the polymer, placed on a shaker and allowed to equilibrate for 12 hours. This process is repeated to generate 5 replicates and implements analytes: propranolol, pseudoephedrine, ephedrine, phenylglycinol, benzylamine, and –methylbenzylamine.

Solutions are then tested by removal of 2 ml aliquots of supernate and filtration of that solution into a 1cm cuvette. Hydrophobic filters are used possessing a 2m diameter which traps any unsettled polymer. Measurements are then taken on a Jasco V-530 UV/VIS Spectrophotometer recording the remaining unbound analyte free in solution.

**Data Manipulation:**

As the six analytes are tested against the eight polymer array, a large 5 x 6 x 8 data matrix is formed. The percent bound values of each analyte are listed against the corresponding polymer in replicates of 5 for a total of 240 data points. With the measured absorption of the initial solution (A0), we are able to subtract the (Ai) unbound analyte to obtain the relative amount bound to the polymer.

(A0 –Ai) / A0  **(1)**

Although it is difficult to see unique signaling patterns are present on the horizontal axis of this matrix. Since each of the six analytes possesses differing ranges in affinity normalization of the signal was implemented. By taking the average of signals per analyte (horizontal) as well as the standard deviation, we can subtract each signal from its average then divide through by the standard deviation to provide a normalized response.

**(Signal – Average Signal) / Standard Dev. (2)**

This response is then placed into one of the statistical programs (Excel, Matlab or Systat) providing the scores, loadings and percent variation for each principle component which can be represents in either a 2-D or 3-D graphical plot.

**Excel:**

**Table 2.** Excel spreadsheet of the polymer array (columns) and a single replicate of the corresponding bound result of each analyte tested (rows).

**Systat: (LDA)**

The raw data matrix was imported into Systat where the samples are represented in rows and variables are listed by columns. The data using the “Discriminate Analysis” option. By identifying the column that is your labels and the group of columns that are your data matrix, the data can be run.
